# Supplementary material
Source: MDPI journal article supplement (https://www.mdpi.com/2073-4395/13/2/345)
Supplement: s1 [file s1]

**Supplementary Table S1.** Partial budget analysis of bread wheat produced in relation to the application of nitrogen (NL) and phosphorus (PL)

| Locations  | NL and PL<br>(kg ha-1) | Fert cost<br>(US Dollar<br>ha-1) | Grain yield<br>price<br>(US Dollar<br>ha-1) | Straw yield<br>price<br>(US Dollar) | Total<br>revenue<br>(US Dollar) | Net revenue<br>(US Dollar) |
|------------|------------------------|----------------------------------|---------------------------------------------|-------------------------------------|---------------------------------|----------------------------|
| <b>NL</b>  |                        |                                  |                                             |                                     |                                 |                            |
| <b>BGL</b> | 35.28                  | 24.58                            | 1944.52                                     | 1090.67                             | 3035.19                         | 3010.62                    |
|            | 65                     | 45.28                            | 2074.46                                     | 1025.59                             | 3100.05                         | 3054.76                    |
|            | 95                     | 66.18                            | 2195.51                                     | 1024.30                             | 3219.82                         | 3153.63                    |
|            | 120                    | 83.60                            | 2283.96                                     | 1006.42                             | 3290.38                         | 3206.78                    |
| <b>BLK</b> | 35.28                  | 24.58                            | 872.77                                      | 470.67                              | 1343.44                         | 1318.86                    |
|            | 65                     | 45.28                            | 1047.92                                     | 525.28                              | 1573.20                         | 1527.91                    |
|            | 95                     | 66.18                            | 1137.41                                     | 561.94                              | 1699.34                         | 1633.16                    |
|            | 120                    | 83.60                            | 1151.31                                     | 586.43                              | 1737.74                         | 1654.14                    |
| <b>HLM</b> | 35.28                  | 24.58                            | 1087.20                                     | 1017.48                             | 2104.68                         | 2080.10                    |
|            | 65                     | 45.28                            | 1188.65                                     | 993.50                              | 2182.15                         | 2136.87                    |
|            | 95                     | 66.18                            | 1268.67                                     | 1008.83                             | 2277.50                         | 2211.32                    |
|            | 120                    | 83.60                            | 1316.66                                     | 1049.46                             | 2366.12                         | 2282.52                    |
| <b>HRT</b> | 35.28                  | 24.58                            | 1645.79                                     | 1039.41                             | 2685.20                         | 2660.62                    |
|            | 65                     | 45.28                            | 1803.09                                     | 1135.14                             | 2938.24                         | 2892.95                    |
|            | 95                     | 66.18                            | 1901.84                                     | 1101.01                             | 3002.85                         | 2936.67                    |
|            | 120                    | 83.60                            | 2038.47                                     | 1114.70                             | 3153.17                         | 3069.57                    |
| <b>PL</b>  |                        |                                  |                                             |                                     |                                 |                            |
| <b>BGL</b> | 0                      | 0.00                             | 1944.85                                     | 988.41                              | 2933.26                         | 2933.26                    |
|            | 50                     | 74.42                            | 2119.37                                     | 1026.80                             | 3146.17                         | 3071.76                    |
|            | 70                     | 104.18                           | 2191.24                                     | 1050.81                             | 3242.05                         | 3137.87                    |
|            | 90                     | 133.95                           | 2242.99                                     | 1080.97                             | 3323.96                         | 3190.01                    |
| <b>BLK</b> | 0                      | 0.00                             | 939.32                                      | 456.76                              | 1396.08                         | 1396.08                    |
|            | 50                     | 74.42                            | 1044.68                                     | 533.92                              | 1578.60                         | 1504.19                    |
|            | 70                     | 104.18                           | 1070.75                                     | 569.16                              | 1639.91                         | 1535.73                    |
|            | 90                     | 133.95                           | 1154.66                                     | 584.48                              | 1739.14                         | 1605.19                    |
| <b>HLM</b> | 0                      | 0.00                             | 983.33                                      | 948.40                              | 1931.72                         | 1931.72                    |
|            | 50                     | 74.42                            | 1174.21                                     | 1008.03                             | 2182.25                         | 2107.83                    |
|            | 70                     | 104.18                           | 1257.45                                     | 1095.21                             | 2352.66                         | 2248.48                    |
|            | 90                     | 133.95                           | 1446.20                                     | 1017.62                             | 2463.82                         | 2329.87                    |
| <b>HRT</b> | 0                      | 0.00                             | 1296.53                                     | 816.31                              | 2112.84                         | 2112.84                    |
|            | 50                     | 74.42                            | 1951.92                                     | 1175.17                             | 3127.09                         | 3052.67                    |
|            | 70                     | 104.18                           | 2040.89                                     | 1161.91                             | 3202.79                         | 3098.61                    |
|            | 90                     | 133.95                           | 2099.85                                     | 1236.88                             | 3336.73                         | 3202.78                    |
